# Supplementary material for: [Cu(N3)(p-CPA)]n: a two dimensional network exhibiting spin reorientation
Source: Royal Society of Chemistry journal article supplement (doi:10.1039/b905707b), 2009-01-01
Supplement: b905707b.pdf [file b905707b.pdf]

Supporting information:

# $[\text{Cu}(\text{N}_3)(p\text{-CPA})]_n$ : a Two Dimensional Network Exhibiting Spin Reorientation

*George E. Kostakis,<sup>a</sup> Kartik Chandra Mondal,<sup>b</sup> Ghulam Abbas,<sup>b</sup> Yanhua Lan,<sup>b</sup>  
Ghenadie Novitchi,<sup>b</sup> Gernot Buth,<sup>c</sup> Christopher E. Anson,<sup>b</sup> and Annie K. Powell<sup>\*a,b</sup>*

<sup>a</sup> *Institute for Nanotechnology, Forschungszentrum Karlsruhe, Karlsruhe Institute of  
Technology, Postfach 3640, D-76021 Karlsruhe, Germany*

<sup>b</sup> *Institut für Anorganische Chemie der Universität Karlsruhe, Karlsruhe Institute of  
Technology, Engesserstr. 15, D-76131 Karlsruhe, Germany. Email: [powell@ioc.uni-  
karlsruhe.de](mailto:powell@ioc.uni-karlsruhe.de); Fax: +49 721 608 8142; Tel: +49 721 608 2135.*

<sup>c</sup> *Institut für Synchrotronstrahlung, Forschungszentrum Karlsruhe, Karlsruhe  
Institute of Technology, Postfach 3640, D - 76021 Karlsruhe, Germany.*

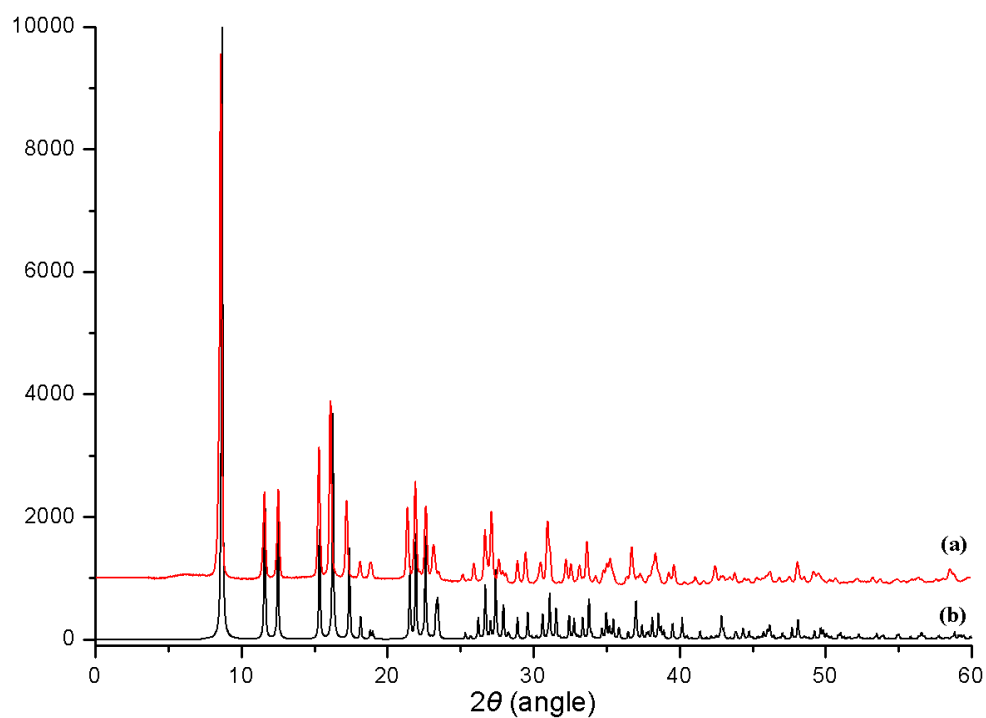

**Fig. S1.** XRPD patterns for compound 1: (a) experimental; (b) simulated

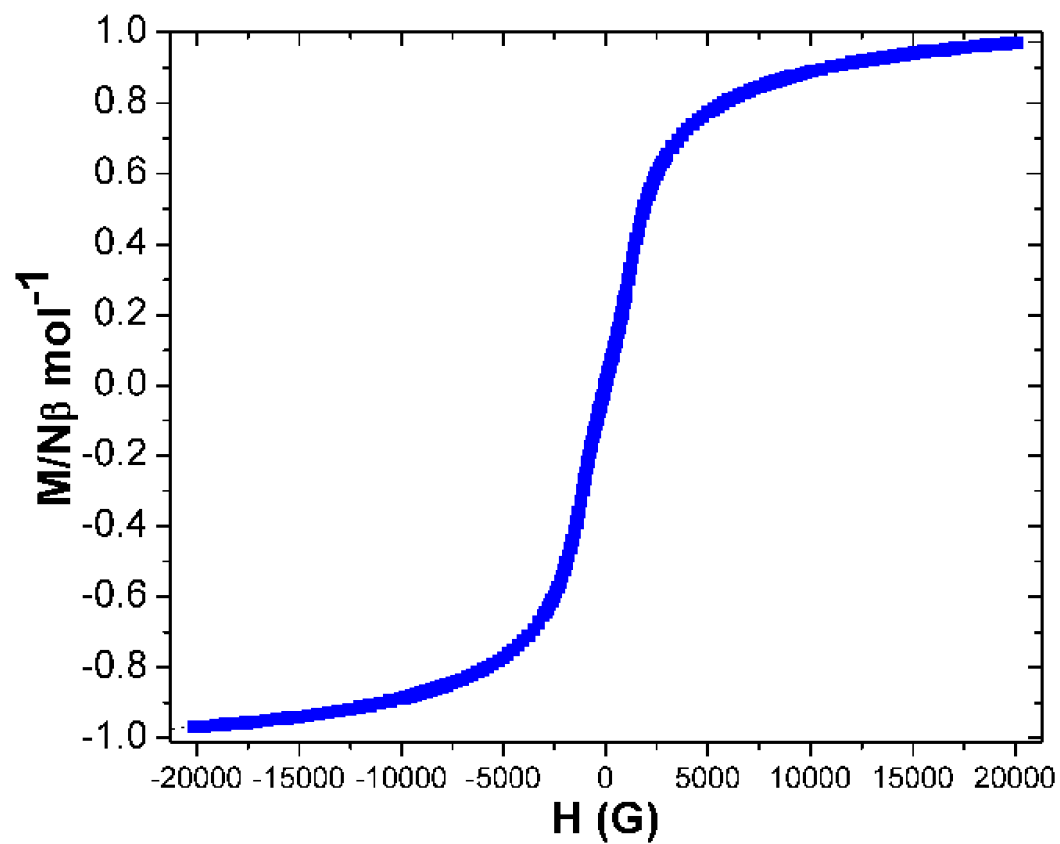

**Figure S2** Plots of  $M$  vs  $H$  plot at 2 K.

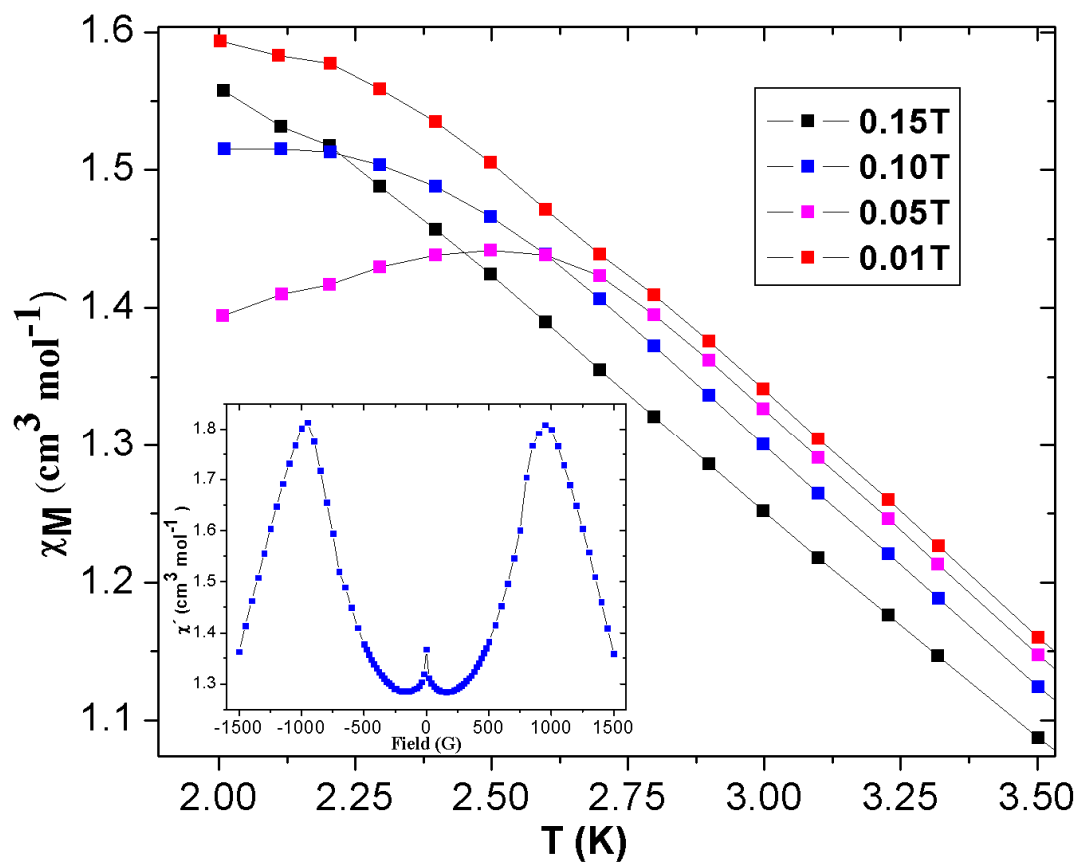

**Figure S3** Plots of  $\chi_M$  vs  $T$  at the indicated fields. Plot of in-phase molar magnetic susceptibility  $\chi'_M$  vs  $H$  (inset) at 2 K.
